# Supplementary material for: The Natural Janus Kinase Inhibitor Agerarin Downregulates Interleukin-4-Induced PER2 Expression in HaCaT Keratinocytes
Source: MDPI journal article supplement (doi:10.3390/molecules27134205), 2022-06-30
Supplement: s1 [file s1]

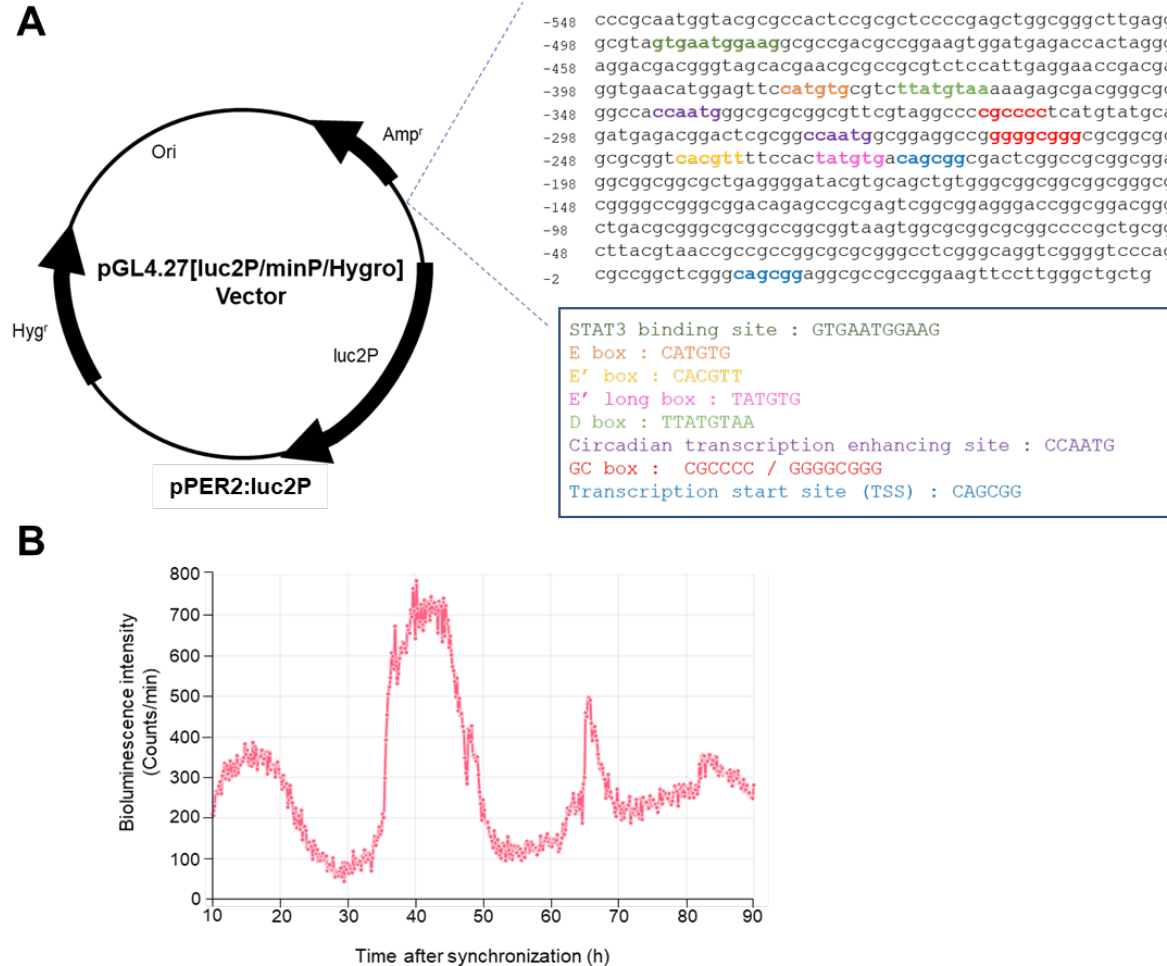

**Supplementary Figure S1.** Generation of live-cell bioluminescence reporter for monitoring of *PER2* expression in live cells. (A) Construction of pPER2:luc2P reporter contained the 5'-regulatory region of the *PER2* gene (-500/+50). STAT3 binding site (SBS), E-box, E'-box, D-Constructionbox, circadian transcription enhancing site (CTIES), GC-box, and transcription initiation site (TIS) are underlined. (B) Representative trace of bioluminescence of PER2:luc2P reporter. HaCaT/PER2:luc2P cells seeded to 96-well plates were synchronized with 100  $\mu$ M dexamethasone for 2 h, then changed to the recording medium containing 1% fetal bovine serum and 1 mM luciferin in a phenol-free medium. Real-time bioluminescence of PER2:luc2P reporter was measured and recorded every 20 min for up to 90 h using Spark10M.
