# Supplementary material for: The Natural Janus Kinase Inhibitor Agerarin Downregulates Interleukin-4-Induced PER2 Expression in HaCaT Keratinocytes
Source: MDPI journal article supplement (doi:10.3390/molecules27134205), 2022-06-30
Supplement: s1 [file s1]

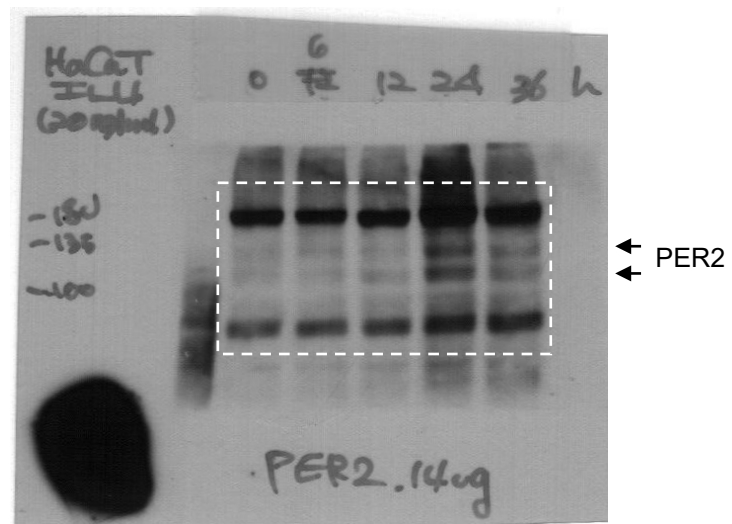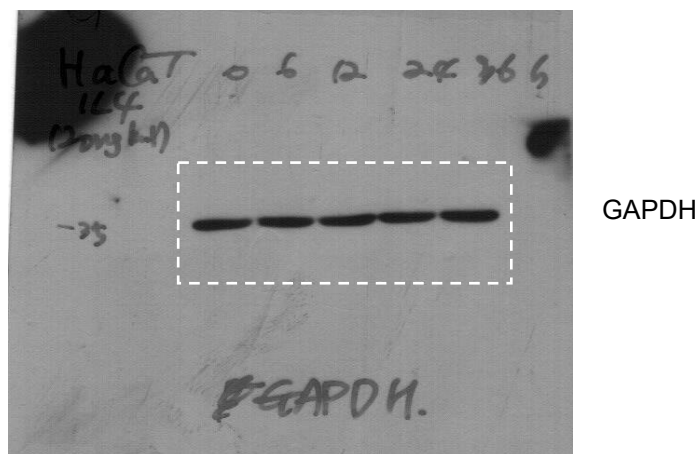

**Supporting Information S1.** Uncropped blots in Figure 1C.

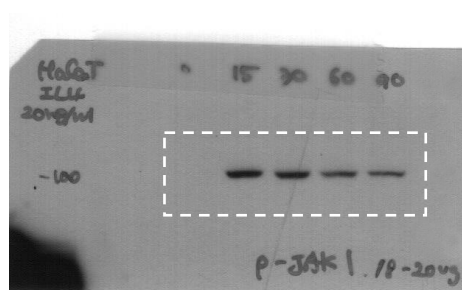

p-JAK1  
(Y1034/1035)

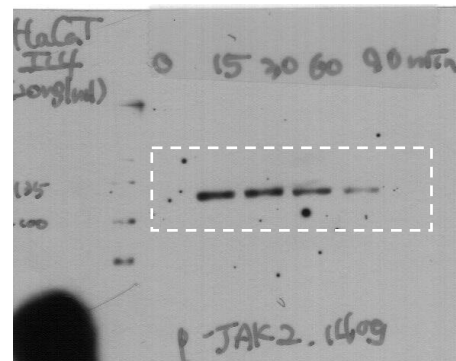

p-JAK2  
(Y1007/1008)

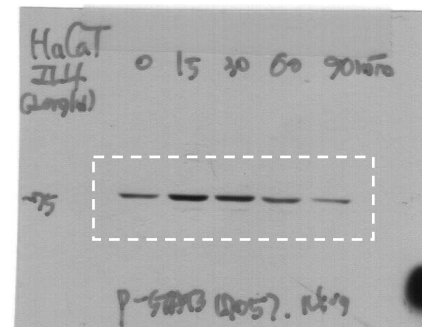

p-STAT3  
(Y705)

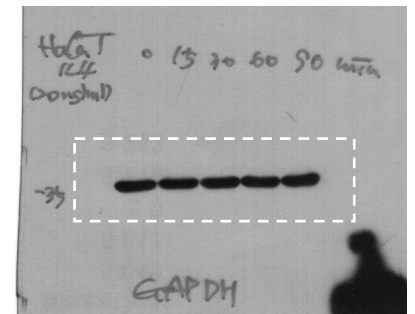

GAPDH

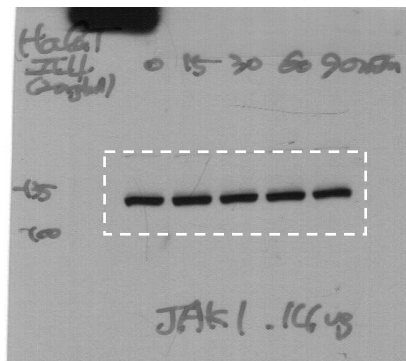

JAK1

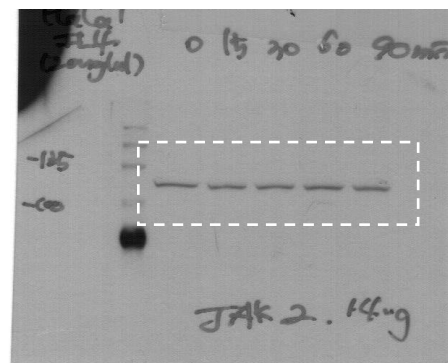

JAK2

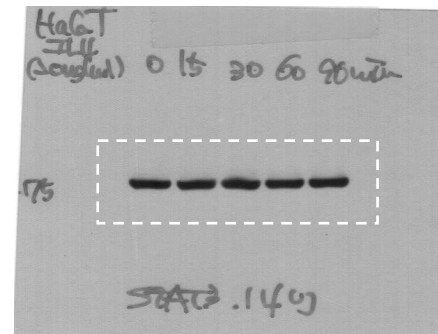

STAT3

**Supporting Information S2.** Uncropped blots in Figure 2A.

**B**

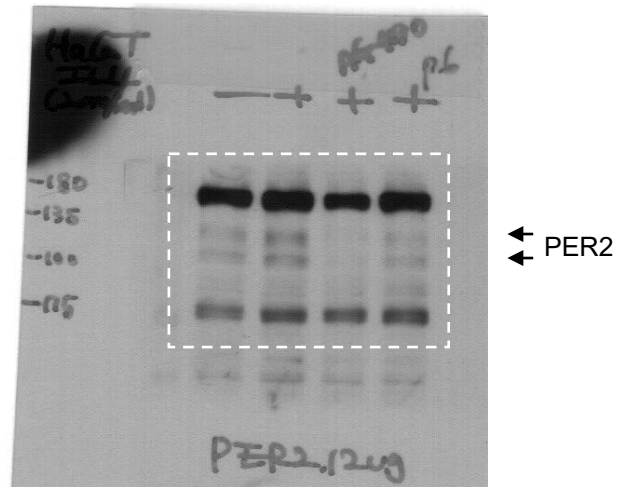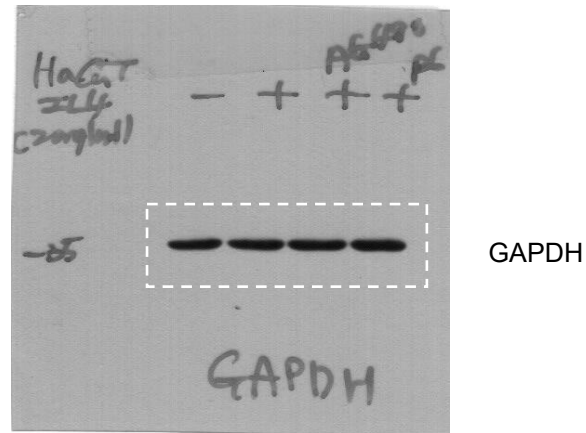

**Supporting Information S3.** Uncropped blots in Figure 2B.

**C**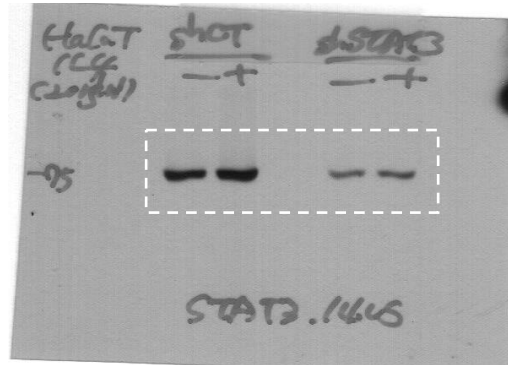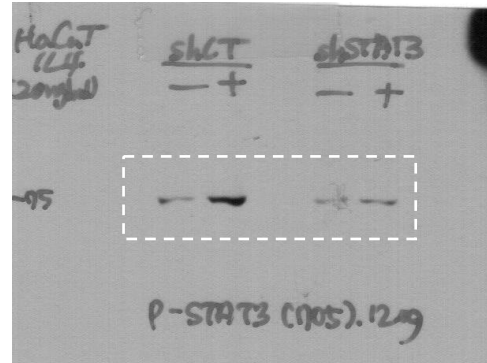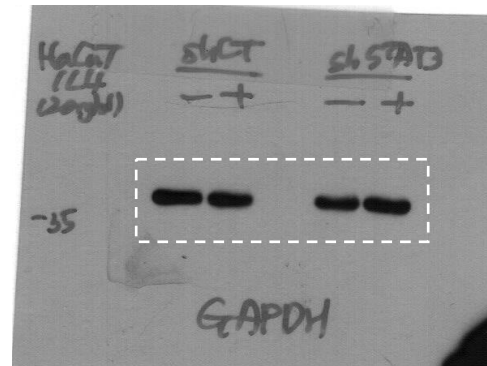**D**

STAT3

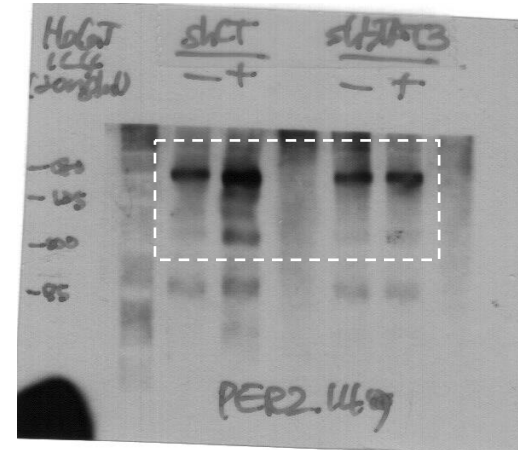

← PER2  
← PER2

p-STAT3 (Y705)

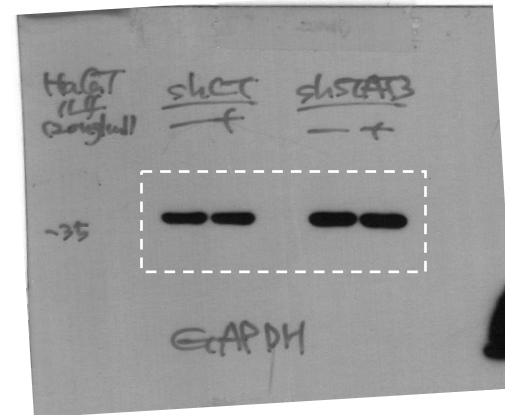

GAPDH

**Supporting Information S4.** Uncropped blots in Figure 2C and D.

**B**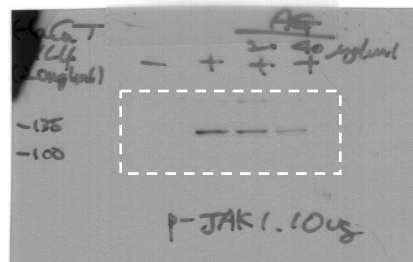

p-JAK1  
(Y1034/1035)

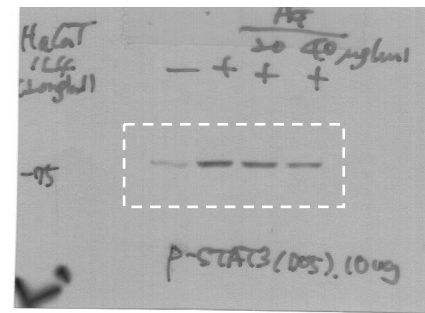

p-STAT3  
(Y705)

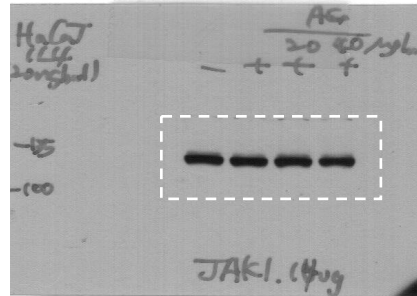

JAK1

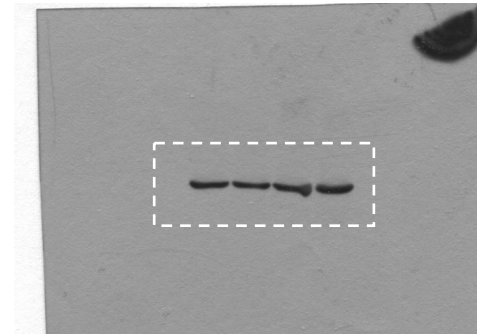

STAT3

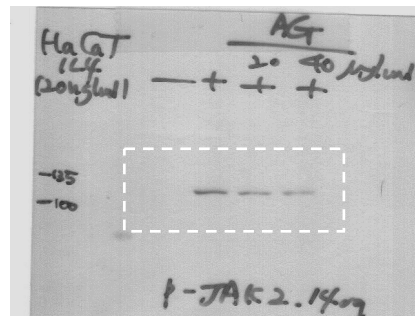

p-JAK2  
(Y1007/1008)

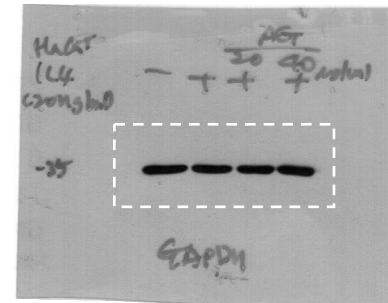

GAPDH

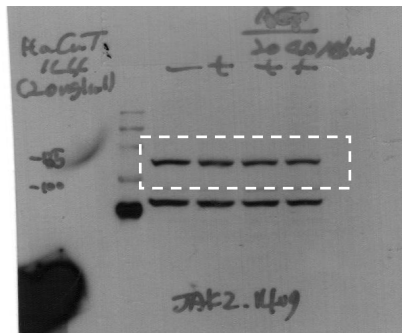

JAK2

**Supporting Information S5.** Uncropped blots in Figure 3B.

C

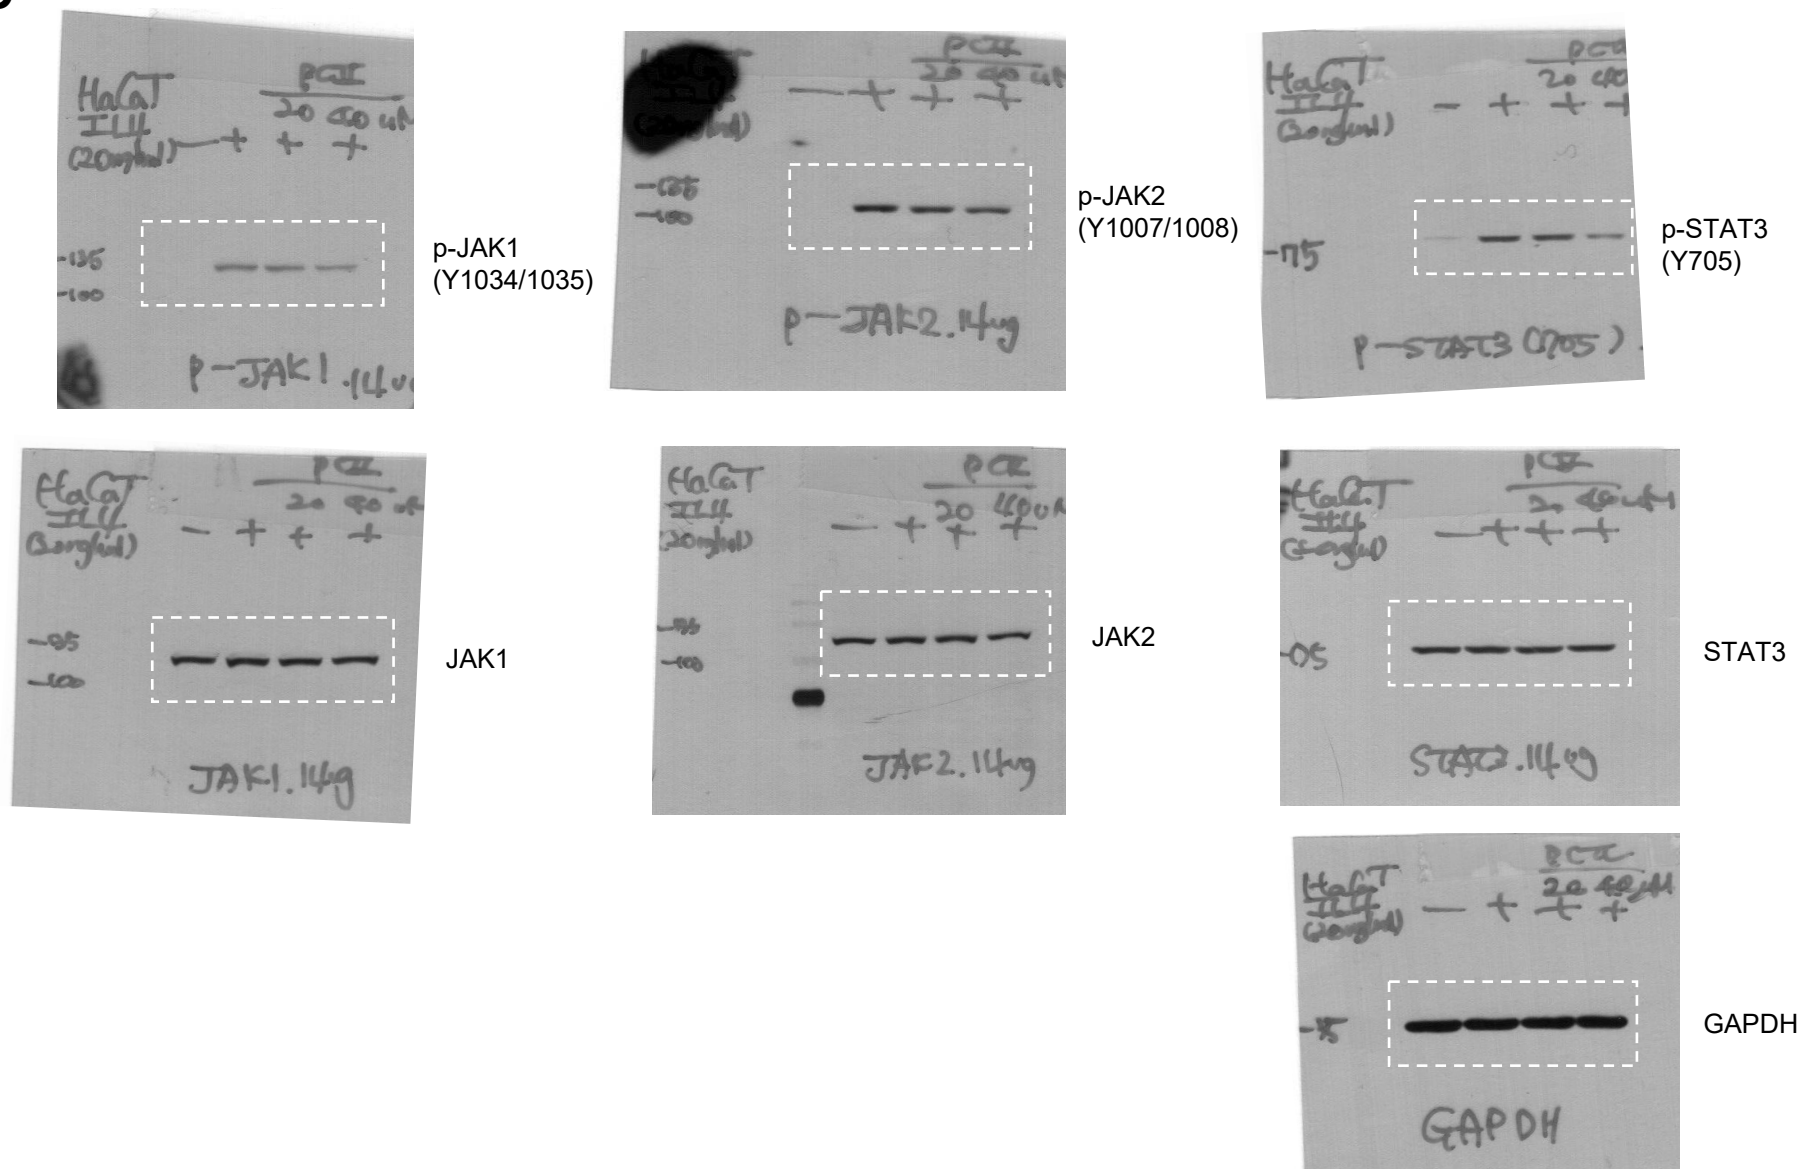

Supporting Information S6. Uncropped blots in Figure 3C.

**B**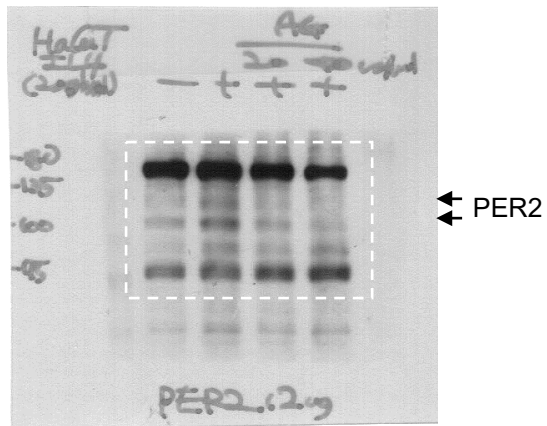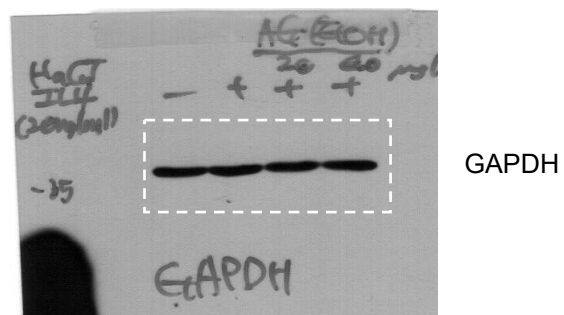**D**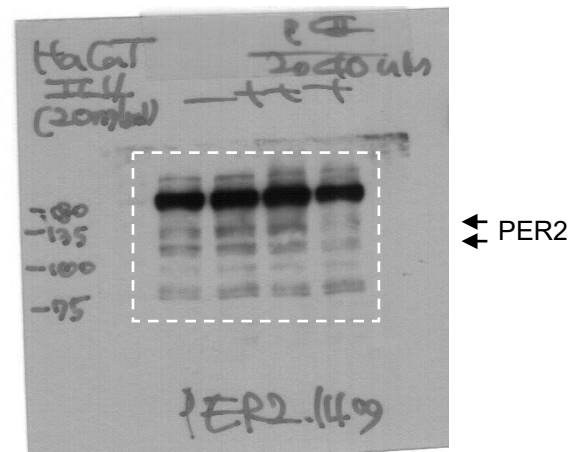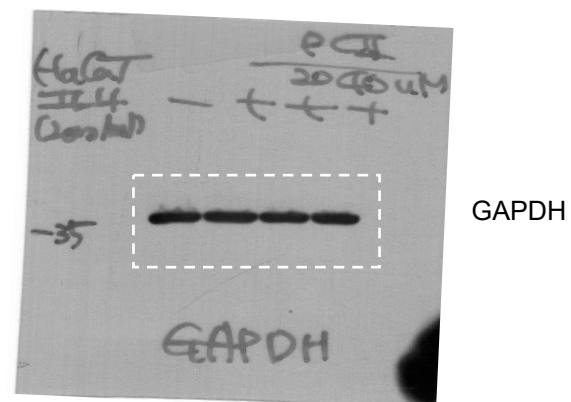

**Supporting Information S7.** Uncropped blots in Figure 4B and D.

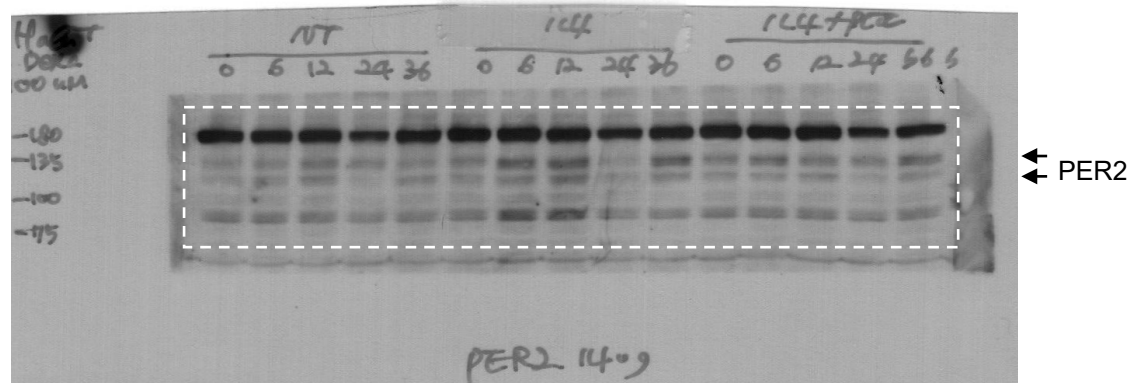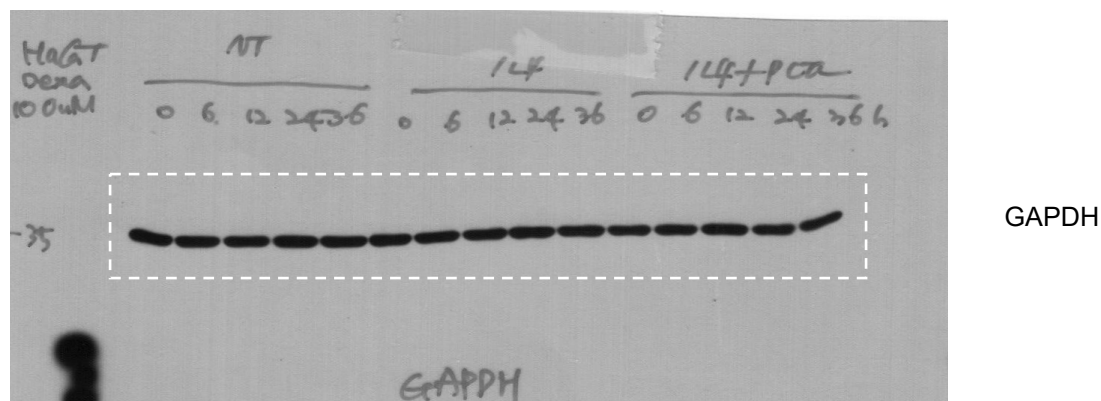

**Supporting Information S8.** Uncropped blots in Figure 6.
